# Supplementary material
Source: HighWire-hosted journal article supplement (https://adc.bmj.com/content/108/5/367)

### Singapore Birth Anthropometry Chart - Chinese, Indian, Malay Boys

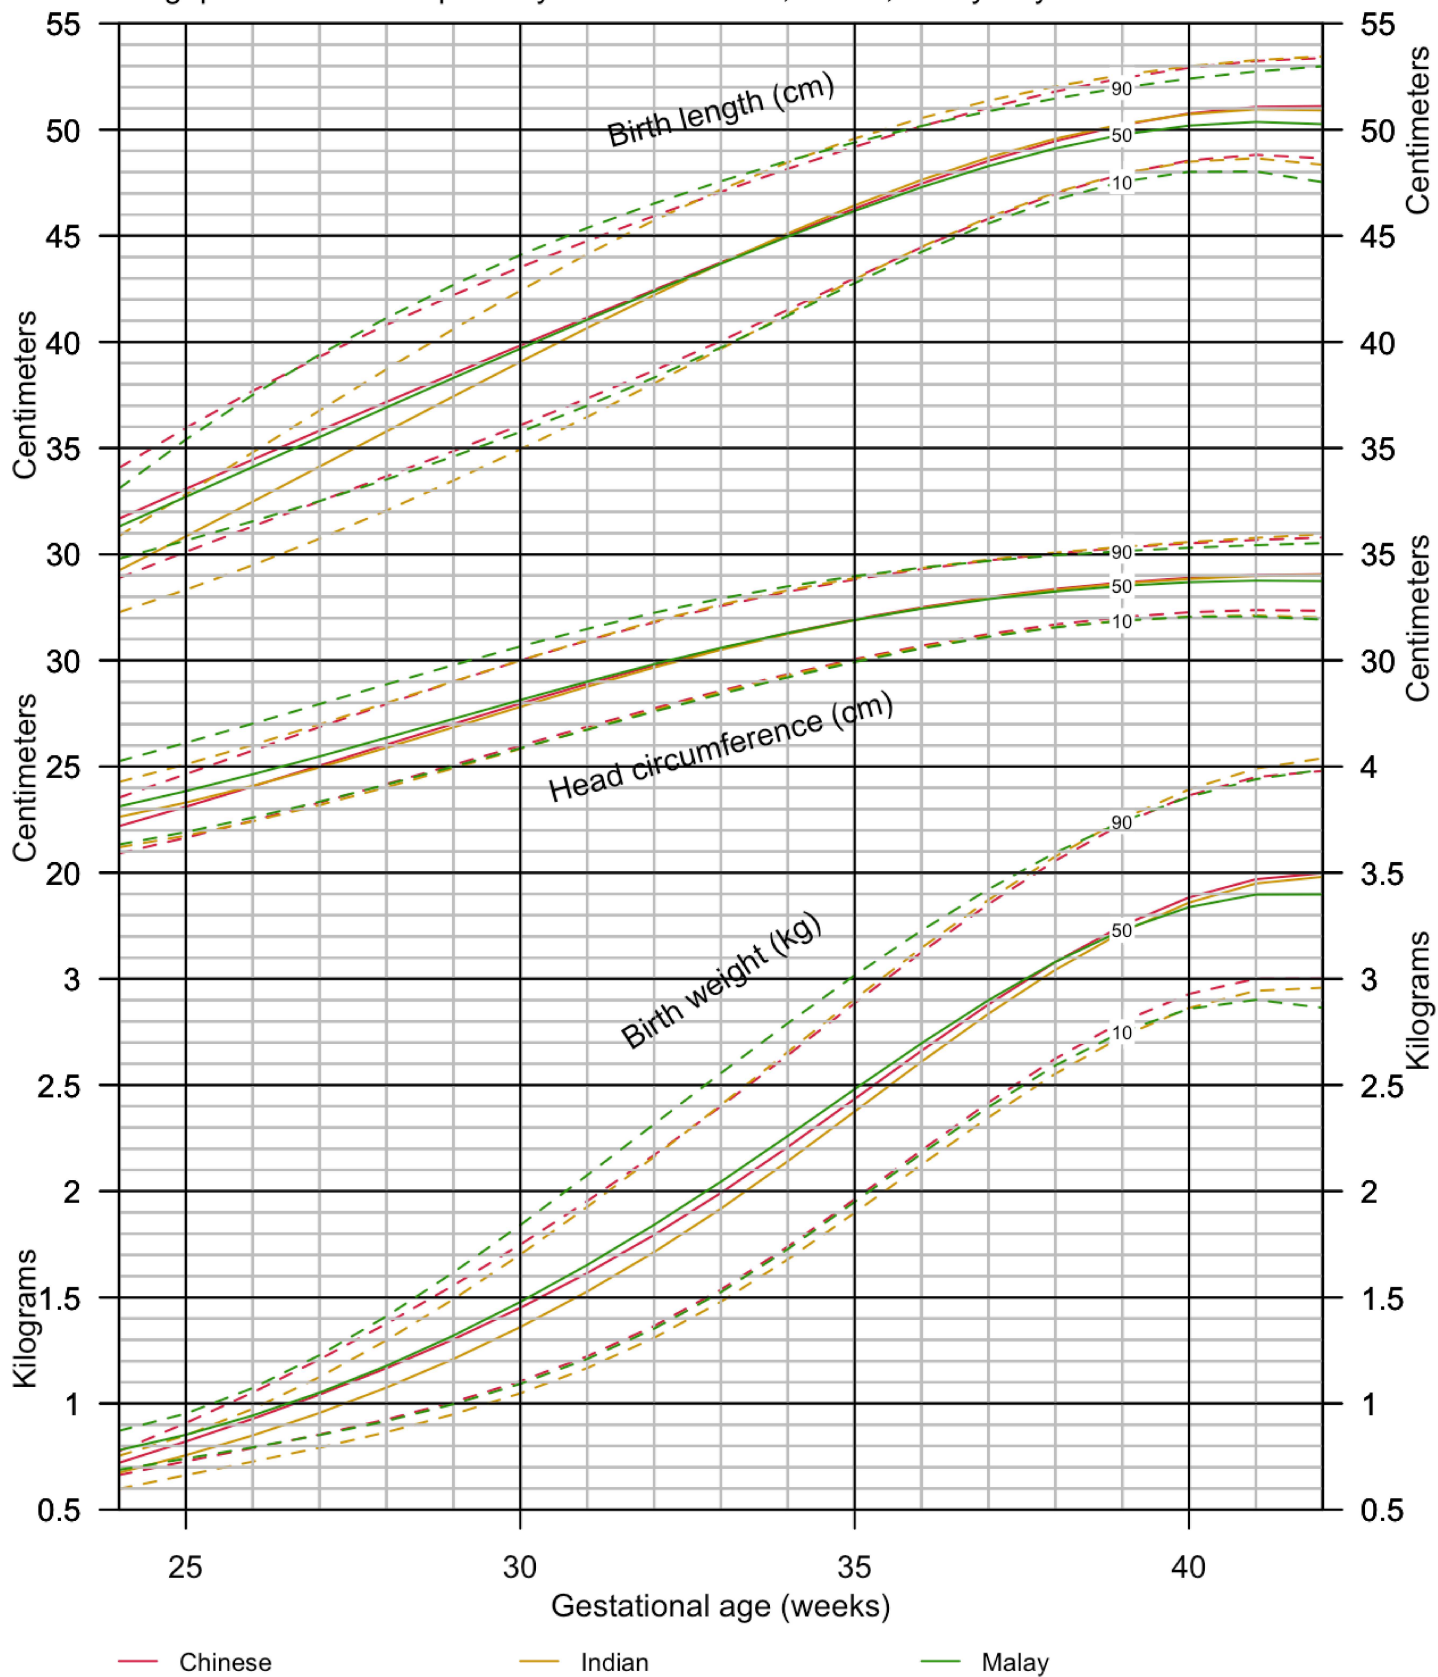

Supplement: inline-supplementary-material-1 [file inline-supplementary-material-1.pdf]

### Singapore Birth Anthropometry Chart - Chinese, Indian, Malay Girls

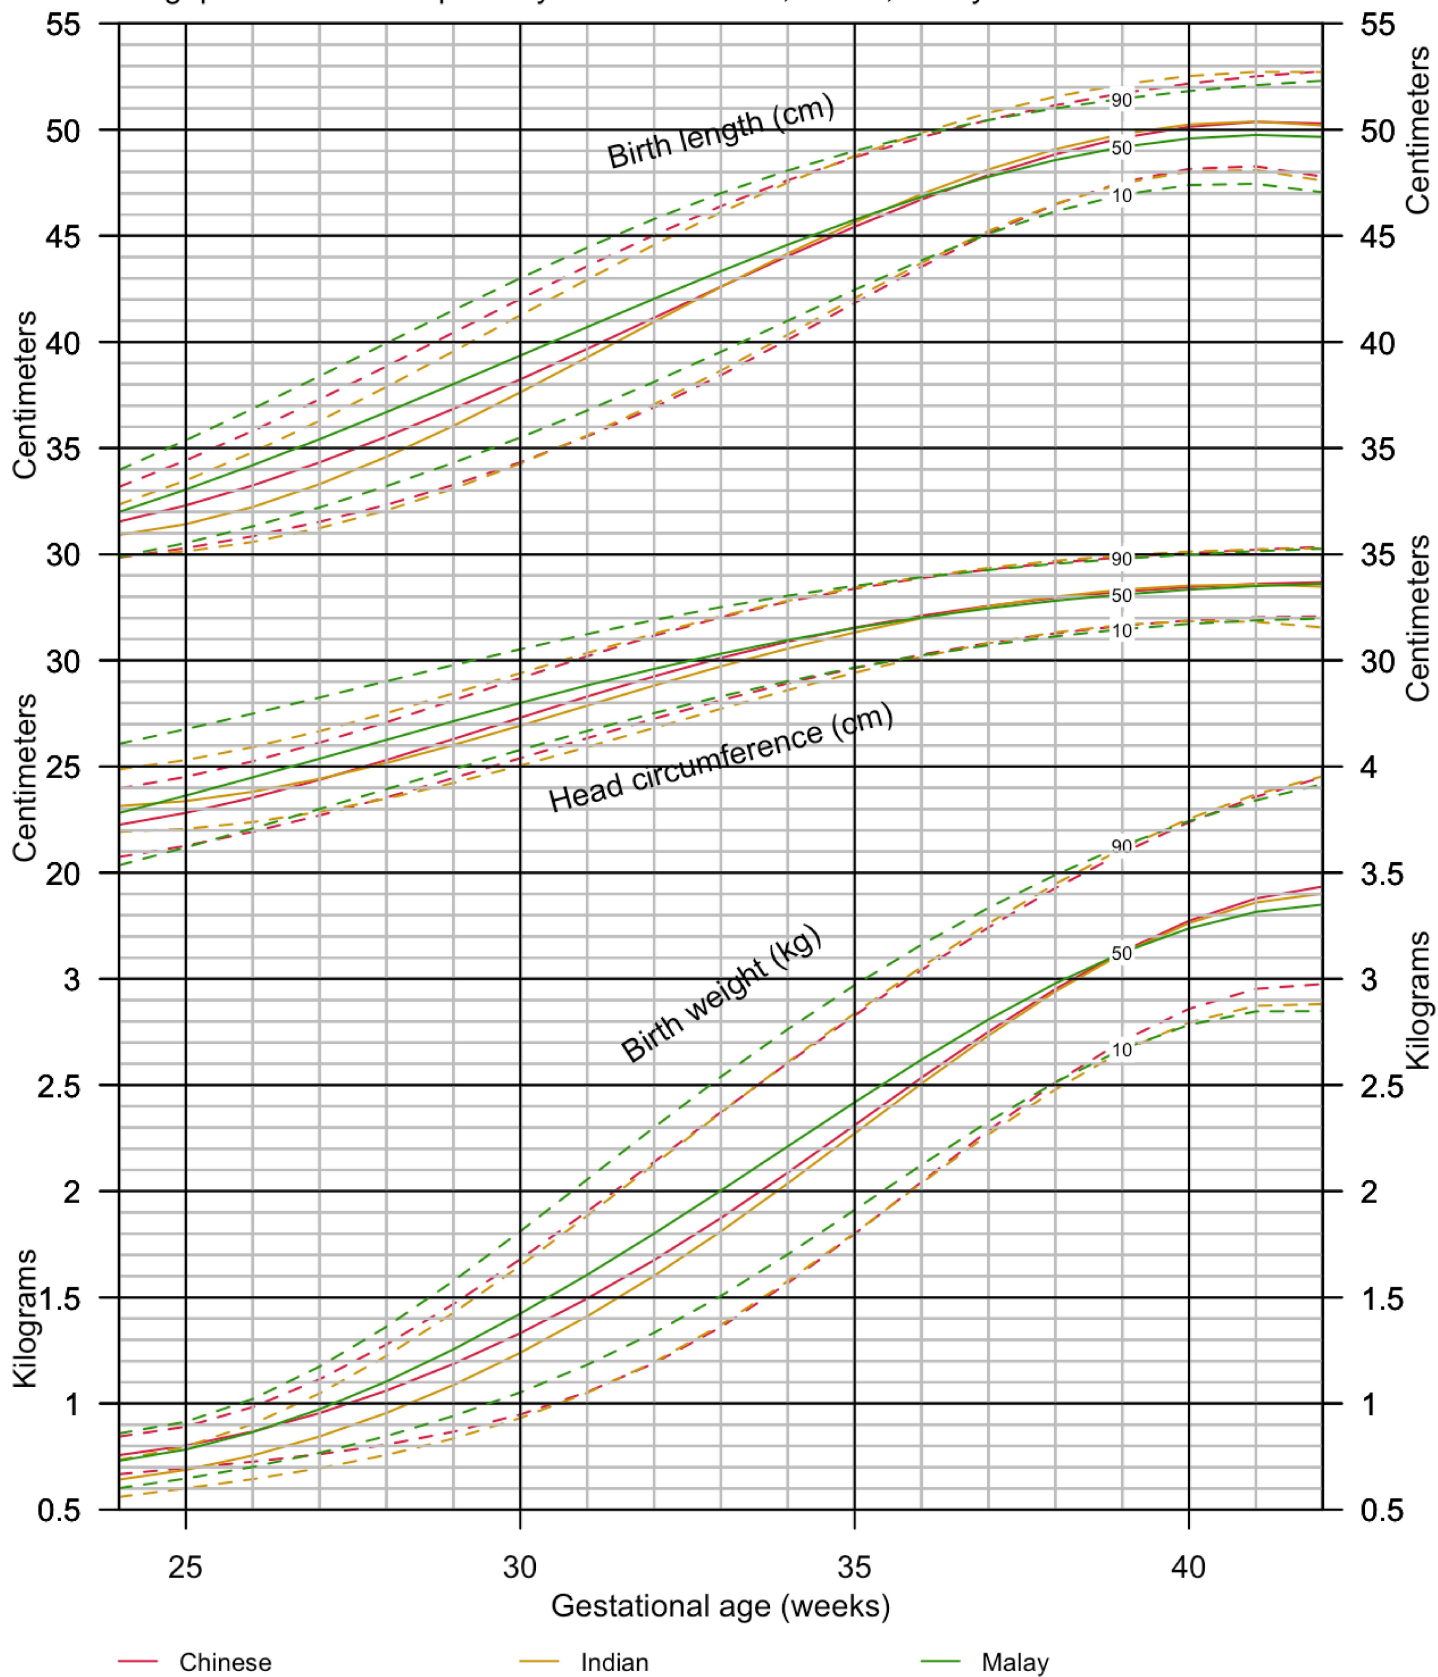

Supplement: inline-supplementary-material-2 [file inline-supplementary-material-2.pdf]

### Singapore Birth Anthropometry Chart - Boys

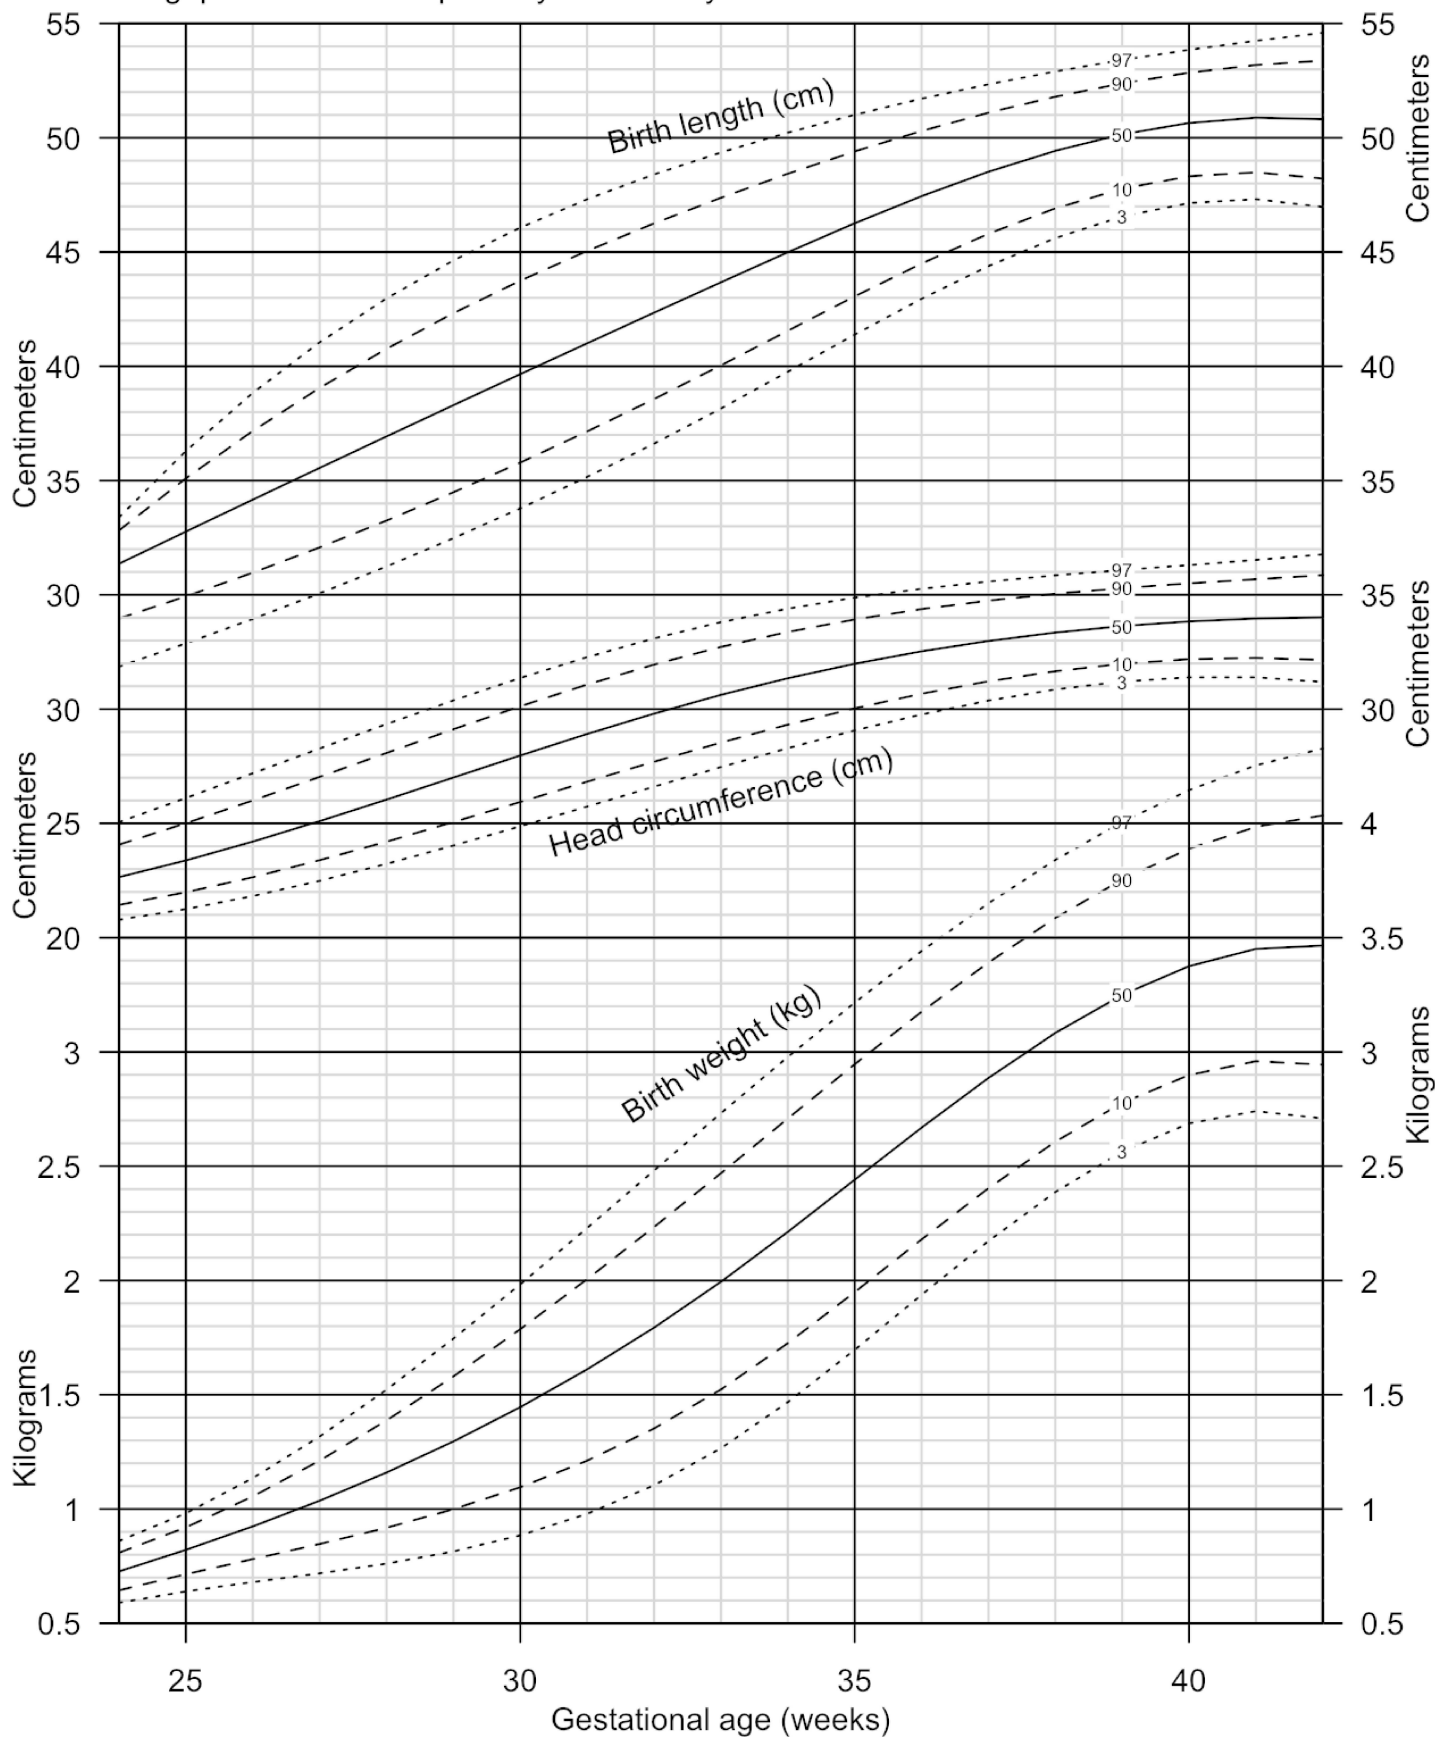

Supplement: inline-supplementary-material-3 [file inline-supplementary-material-3.pdf]

### Singapore Birth Anthropometry Chart - Girls

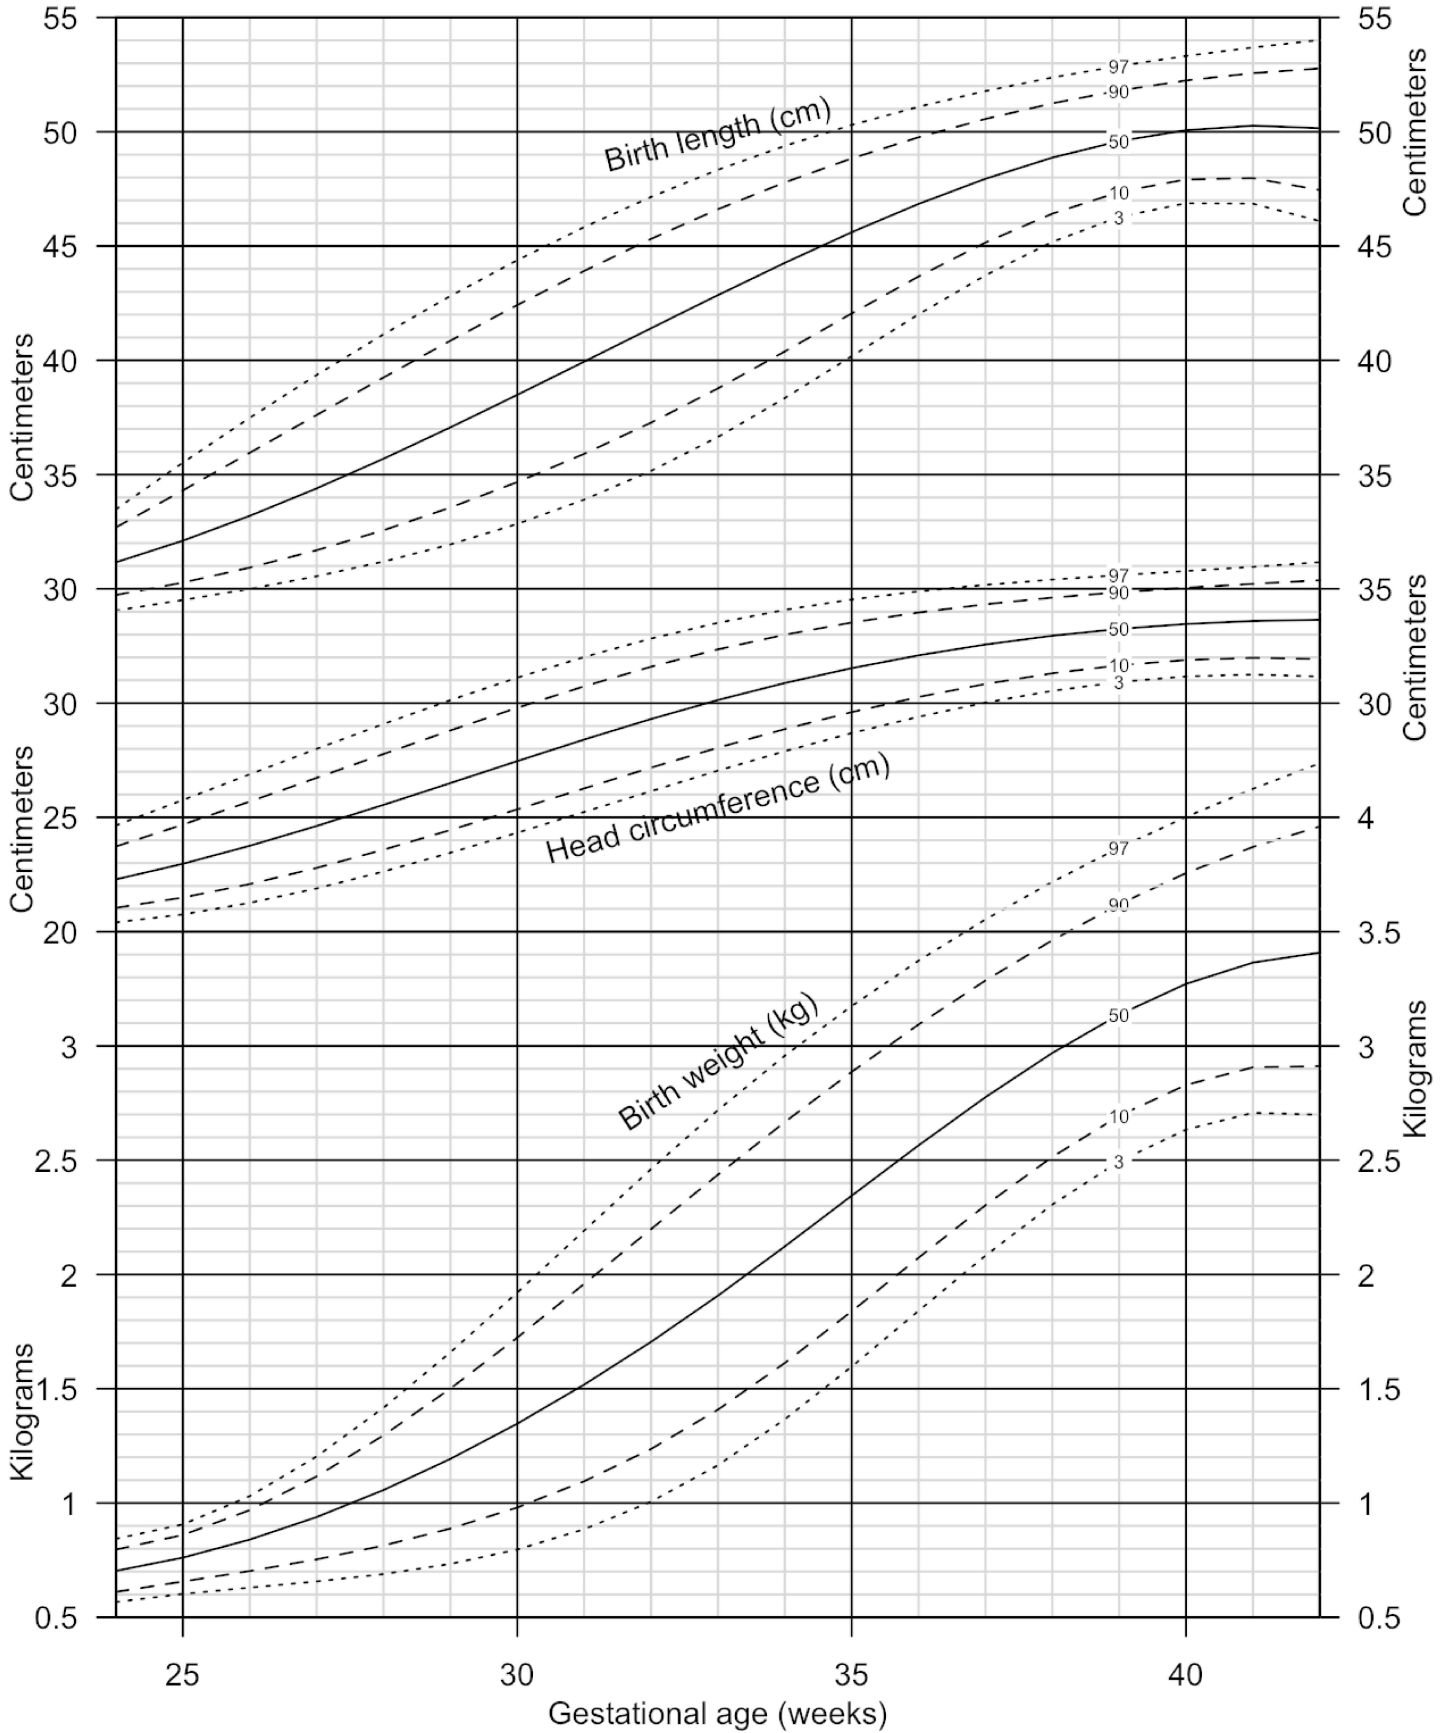

Supplement: inline-supplementary-material-4 [file inline-supplementary-material-4.pdf]
